# Supplementary material for: Formation of maghemite nanostructures in polyol: tuning the particle size via the precursor stoichiometry
Source: Royal Society of Chemistry journal article supplement (doi:10.1039/c8ce02115e), 2019-01-01
Supplement: c8ce02115e1.pdf [file c8ce02115e1.pdf]

## - ELECTRONIC SUPPLEMENTARY INFORMATION -

### **Formation of maghemite nanoflowers in polyol: tuning the particle size via the precursor stoichiometry**

Marcel Wetegrove<sup>1,\*</sup>, Kerstin Witte<sup>1</sup>, Wiktor Bodnar<sup>2</sup>, Dan-Eric Pfahl<sup>1</sup>, Armin Springer<sup>3</sup>,  
Norbert Schell<sup>4</sup>, Fritz Westphal<sup>5</sup> and Eberhard Burkel<sup>1</sup>

<sup>1</sup> *University of Rostock, Institute of Physics, Albert-Einstein-Str. 23, 18059 Rostock, Germany*

<sup>2</sup> *INP Leibniz Institute for Plasma Science and Technology, Felix-Hausdorff-Str. 2, 17489 Greifswald, Germany*

<sup>3</sup> *University Medicine Rostock, Medical Biology and Electron Microscopy Centre,  
Strempelstr. 14, 18057 Rostock, Germany*

<sup>4</sup> *Helmholtz Centre Geesthacht, Institute of Materials Research, Max Planck-Str. 1, 21502 Geesthacht, Germany*

<sup>5</sup> *micromod Partikeltechnologie GmbH, Friedrich-Barnewitz-Str.4, 18119 Rostock, Germany*

*\* Corresponding author: marcel.wetegrove@uni-rostock.de*

## **Contents**

|          |                                        |          |
|----------|----------------------------------------|----------|
| <b>1</b> | <b>TEM Particle Size Distributions</b> | <b>2</b> |
| <b>2</b> | <b>Mössbauer fitting parameters</b>    | <b>3</b> |

# 1 TEM Particle Size Distributions

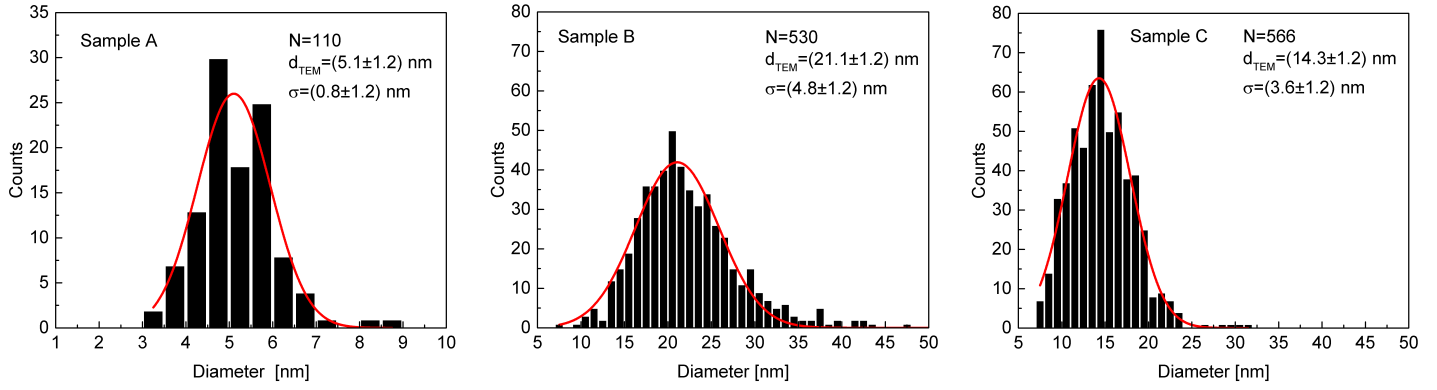

Figure 1: Particle size distributions for samples A, B and C.  $N$  is the number of evaluated particles,  $d_{TEM}$  is the mean value and  $\sigma$  is the standard deviation of the normal distribution.

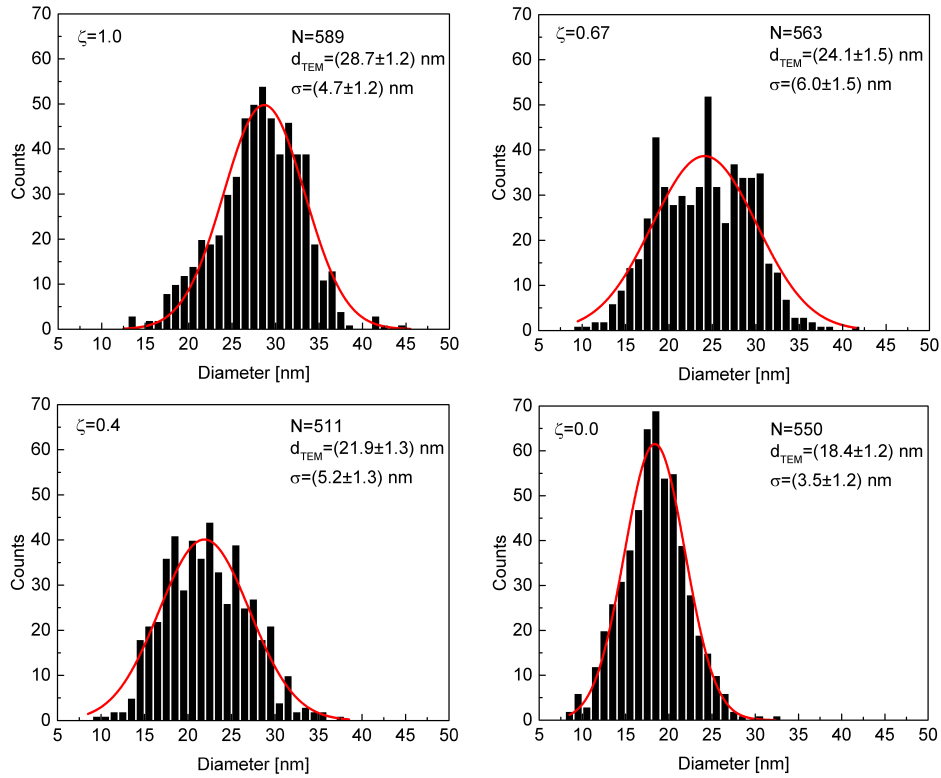

Figure 2: Particle size distributions for samples prepared with  $\zeta = 1; 0.67; 0.4$  and  $0.0$ .  $N$  is the number of evaluated particles,  $d_{TEM}$  is the mean value and  $\sigma$  is the standard deviation of the normal distribution.

## 2 Mössbauer fitting parameters

| Sample B       |                                     |                                     |                           |                                       |               |
|----------------|-------------------------------------|-------------------------------------|---------------------------|---------------------------------------|---------------|
| Site           | IS [ $\frac{\text{mm}}{\text{s}}$ ] | QS [ $\frac{\text{mm}}{\text{s}}$ ] | $\mu_0 H_{\text{hf}}$ [T] | FWHM [ $\frac{\text{mm}}{\text{s}}$ ] | Rel. int. [%] |
| A <sub>b</sub> | $0.326 \pm 0.002$                   | $-0.007 \pm 0.002$                  | $47.3 \pm 0.1$            | $0.288 \pm 0.005$                     | 46.1          |
| B <sub>b</sub> | $0.352 \pm 0.004$                   | $-0.017 \pm 0.004$                  | $45.1 \pm 0.1$            | $0.326 \pm 0.011$                     | 30.9          |
| A <sub>s</sub> | $0.401 \pm 0.007$                   | $-0.001 \pm 0.006$                  | $41.9 \pm 0.1$            | $0.337 \pm 0.020$                     | 15.2          |
| B <sub>s</sub> | $0.434 \pm 0.011$                   | $-0.01 \pm 0.01$                    | $38.1 \pm 0.2$            | $0.328 \pm 0.024$                     | 7.7           |
| Sample C       |                                     |                                     |                           |                                       |               |
| Site           | IS [ $\frac{\text{mm}}{\text{s}}$ ] | QS [ $\frac{\text{mm}}{\text{s}}$ ] | $\mu_0 H_{\text{hf}}$ [T] | FWHM [ $\frac{\text{mm}}{\text{s}}$ ] | Rel. int. [%] |
| A <sub>b</sub> | $0.330 \pm 0.011$                   | $-0.01 \pm 0.01$                    | $44.9 \pm 0.2$            | $0.47 \pm 0.04$                       | 19.4          |
| B <sub>b</sub> | $0.313 \pm 0.016$                   | $-0.010 \pm 0.015$                  | $40.1 \pm 0.5$            | $0.87 \pm 0.09$                       | 38.6          |
| A <sub>s</sub> | $0.38 \pm 0.07$                     | $0.00 \pm 0.06$                     | $33.0 \pm 0.8$            | $0.98 \pm 0.24$                       | 23.0          |
| B <sub>s</sub> | $0.34 \pm 0.09$                     | $0.06 \pm 0.06$                     | $18.3 \pm 0.9$            | $1.20 \pm 0.60$                       | 17.9          |
| Doublet        | $0.48 \pm 0.08$                     | $1.49 \pm 0.17$                     | -                         | $0.36 \pm 0.18$                       | 1.1           |
| $\zeta = 1.0$  |                                     |                                     |                           |                                       |               |
| Site           | IS [ $\frac{\text{mm}}{\text{s}}$ ] | QS [ $\frac{\text{mm}}{\text{s}}$ ] | $\mu_0 H_{\text{hf}}$ [T] | FWHM [ $\frac{\text{mm}}{\text{s}}$ ] | Rel. int. [%] |
| A <sub>b</sub> | $0.324 \pm 0.003$                   | $0.006 \pm 0.002$                   | $47.8 \pm 0.1$            | $0.241 \pm 0.005$                     | 41.5          |
| B <sub>b</sub> | $0.329 \pm 0.004$                   | $0.002 \pm 0.002$                   | $46.1 \pm 0.1$            | $0.280 \pm 0.011$                     | 34.7          |
| A <sub>s</sub> | $0.361 \pm 0.013$                   | $-0.003 \pm 0.002$                  | $43.2 \pm 0.2$            | $0.343 \pm 0.012$                     | 16.8          |
| B <sub>s</sub> | $0.445 \pm 0.016$                   | $-0.006 \pm 0.004$                  | $39.2 \pm 0.3$            | $0.352 \pm 0.014$                     | 7.0           |
| $\zeta = 0.67$ |                                     |                                     |                           |                                       |               |
| Site           | IS [ $\frac{\text{mm}}{\text{s}}$ ] | QS [ $\frac{\text{mm}}{\text{s}}$ ] | $\mu_0 H_{\text{hf}}$ [T] | FWHM [ $\frac{\text{mm}}{\text{s}}$ ] | Rel. int. [%] |
| A <sub>b</sub> | $0.325 \pm 0.008$                   | $0.002 \pm 0.002$                   | $47.0 \pm 0.2$            | $0.297 \pm 0.014$                     | 38.4          |
| B <sub>b</sub> | $0.327 \pm 0.009$                   | $0.001 \pm 0.001$                   | $44.9 \pm 0.2$            | $0.366 \pm 0.011$                     | 33.6          |
| A <sub>s</sub> | $0.344 \pm 0.022$                   | $-0.002 \pm 0.002$                  | $40.9 \pm 0.3$            | $0.54 \pm 0.04$                       | 20.8          |
| B <sub>s</sub> | $0.463 \pm 0.028$                   | $-0.003 \pm 0.003$                  | $36.8 \pm 0.3$            | $0.55 \pm 0.08$                       | 7.2           |
| $\zeta = 0.4$  |                                     |                                     |                           |                                       |               |
| Site           | IS [ $\frac{\text{mm}}{\text{s}}$ ] | QS [ $\frac{\text{mm}}{\text{s}}$ ] | $\mu_0 H_{\text{hf}}$ [T] | FWHM [ $\frac{\text{mm}}{\text{s}}$ ] | Rel. int. [%] |
| A <sub>b</sub> | $0.317 \pm 0.008$                   | $0.002 \pm 0.002$                   | $46.7 \pm 0.1$            | $0.301 \pm 0.008$                     | 39.5          |
| B <sub>b</sub> | $0.319 \pm 0.015$                   | $-0.004 \pm 0.002$                  | $44.4 \pm 0.3$            | $0.370 \pm 0.014$                     | 25.5          |
| A <sub>s</sub> | $0.341 \pm 0.022$                   | $-0.007 \pm 0.004$                  | $41.0 \pm 0.4$            | $0.519 \pm 0.026$                     | 25.7          |
| B <sub>s</sub> | $0.46 \pm 0.03$                     | $-0.008 \pm 0.004$                  | $35.9 \pm 0.5$            | $0.55 \pm 0.08$                       | 9.3           |
| $\zeta = 0.0$  |                                     |                                     |                           |                                       |               |
| Site           | IS [ $\frac{\text{mm}}{\text{s}}$ ] | QS [ $\frac{\text{mm}}{\text{s}}$ ] | $\mu_0 H_{\text{hf}}$ [T] | FWHM [ $\frac{\text{mm}}{\text{s}}$ ] | Rel. int. [%] |
| A <sub>b</sub> | $0.311 \pm 0.013$                   | $-0.004 \pm 0.002$                  | $44.6 \pm 0.2$            | $0.446 \pm 0.021$                     | 23.4          |
| B <sub>b</sub> | $0.319 \pm 0.015$                   | $-0.008 \pm 0.002$                  | $41.2 \pm 0.4$            | $0.53 \pm 0.04$                       | 24.4          |
| A <sub>s</sub> | $0.358 \pm 0.025$                   | $-0.008 \pm 0.003$                  | $36.3 \pm 0.4$            | $0.82 \pm 0.06$                       | 33.0          |
| B <sub>s</sub> | $0.44 \pm 0.04$                     | $-0.012 \pm 0.004$                  | $26.9 \pm 0.9$            | $0.92 \pm 0.12$                       | 13.6          |
| Doublet        | $0.41 \pm 0.04$                     | $2.38 \pm 0.12$                     | -                         | $0.9 \pm 0.1$                         | 5.6           |

Table 1: Hyperfine parameters of all contributing subspectra with bulk and surface contributions for A- and B-sites for samples B, C, and  $\zeta=1.0$ ; 0.67; 0.4; 0.0. Two samples were fitted with an additional doublet.
